# Supplementary material for: Electrochemical behaviour, IR spectroelectrochemistry and theoretical studies of tetracobalt carbonyl cluster complexes with a facial cyclooctatetraene ligand
Source: Royal Society of Chemistry journal article supplement (doi:10.1039/b205535j), 2002-01-01
Supplement: b205535j.doc [file b205535j.doc]

# Supplementary Material

**Table S1.** Comparison between some calculated and experimental distances (Å) in cluster complexes [Co4(CO)3(3-CO)3(3-C8H8)L2] **1** (L2 =  4-C8H8), **2** (L2 =  4-C6H8), **4** (L = CO), and [Co3(CO)3(2-CO)3(3-C8H8)]- **5**. For atom numbering cf. Scheme 1.

|  | **1**  L2 = 4-C8H8 | | **2**  L2 = 4-C6H8 | | **4**  L2 = (CO)2 | | **5**  [Co3(CO)6(C8H8)]- | |
| --- | --- | --- | --- | --- | --- | --- | --- | --- |
|  | Exp. | Calc. | Exp. | Calc. | Exp. | Calc. | Exp. | Calc. |
| Co1-Co2 | 2.47 | 2.48 | 2.44 | 2.44 | 2.44 | 2.41 | **-----** | **-----** |
| Co1-Co3 | 2.46 | 2.48 | 2.44 | 2.45 | 2.50 | 2.52 | **-----** | **-----** |
| Co1-Co4 | 2.53 | 2.53 | 2.54 | 2.55 | 2.60 | 2.62 | **-----** | **-----** |
| Co2-Co3 | 2.54 | 2.58 | 2.54 | 2.56 | 2.54 | 2.56 | 2.53 | 2.55 |
| Co2-Co4 | 2.51 | 2.54 | 2.53 | 2.55 | 2.54 | 2.56 | 2.53 | 2.55 |
| Co3-Co4 | 2.52 | 2.55 | 2.52 | 2.55 | 2.52 | 2.55 | 2.51 | 2.54 |
| Co1-(L2) | 2.25a | 2.30a | 2.10a | 2.12a | 1.76 | 1.76 | **-----** | **-----** |
| 2.03b | 2.02b | 2.02b | 2.03b | 1.78 | 1.78 | **-----** | **-----** |
| 2.02b | 2.02b | 2.02b | 2.03b | **-----** | **-----** | **-----** | **-----** |
| 2.19a | 2.25a | 2.11a | 2.12a | **-----** | **-----** | **-----** | **-----** |

a 'Outer' carbons of the 1,4-diene ligand. b 'Inner' carbons of the 1,4-diene ligand.
